# Supplementary material for: Genome-Wide Analysis of the WRKY Transcription Factor Family in Roses and Their Putative Role in Defence Signalling in the Rose–Blackspot Interaction
Source: MDPI journal article supplement (doi:10.3390/plants13081066), 2024-04-10
Supplement: s1 [file s1]

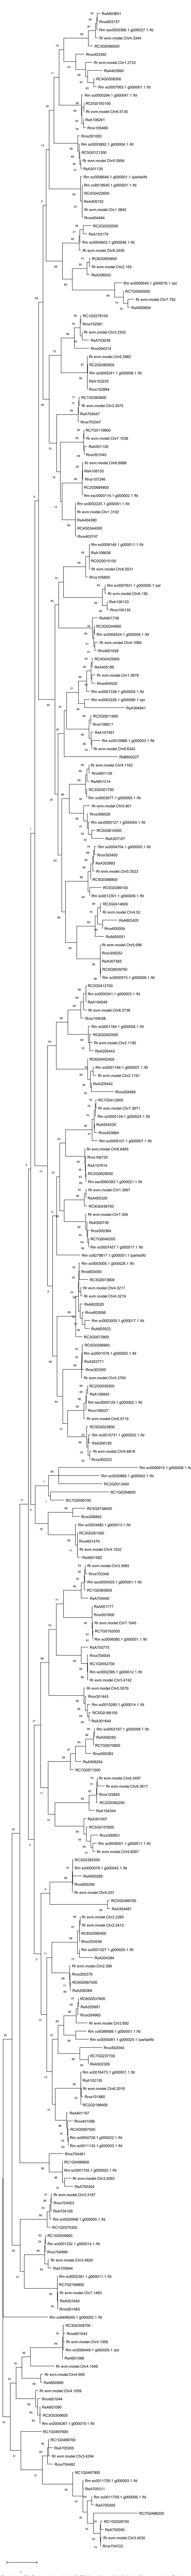

Supplement S3: Phylogenetic analysis of WRKY candidates of the following five rose species: *R. chinensis* (Hibrand Saint-Oyant et al. 2018), *R. multiflora* (Nakamura et al. 2018), *R. rugosa* (Chen et al. 2021), *R. roxburghii* and *R. sterilis* (Zong et al. 2024). The protein names are taken from the publications mentioned, the protein sequences can be found in S2. The generation of the phylogenetic tree is described in Section 2, Materials & Methods.
